# Supplementary material for: The formation process of five-component Cu–In–Zn–Se–S nanocrystals from ternary Cu–In–S and quaternary Cu–In–Se–S nanocrystals via gradually induced synthesis
Source: Royal Society of Chemistry journal article supplement (doi:10.1039/d1tc02108g), 2021-01-01
Supplement: d1tc02108g1.pdf [file d1tc02108g1.pdf]

**The Formation Process of Five-Component Cu-In-Zn-Se-S  
Nanocrystals from Ternary Cu-In-S and Quaternary Cu-In-Se-S  
Nanocrystals via Gradually Induced Synthesis**

Zhongyuan Guan,<sup>a</sup> Haihang Ye,<sup>\*b</sup> Peiwen Lv,<sup>a</sup> Lijin Wang,<sup>a</sup> Jing Zhang,<sup>a</sup>

Bin Zou,<sup>\*c</sup> Aiwei Tang,<sup>\*a</sup>

<sup>a</sup> *Key Laboratory of Luminescence and Optical Information, Ministry of Education,  
School of Science, Beijing Jiaotong University, Beijing 100044, China. E-mail:  
awtang@bjtu.edu.cn*

<sup>b</sup> *Mechanical Engineering Department, University of Texas at Dallas, Richardson,  
Texas 75080, USA. E-mail: Haihang.Ye@utdallas.edu*

<sup>c</sup> *School of Science, Minzu University of China, Beijing 100081, China, E-mail:  
zoubin@muc.edu.cn*

**Table S1.** Summary of the fluorescence decay lifetime data of Cu-In-Se-S NCs obtained by the one-pot method.

|        | $\alpha_1$ (%) | $\tau_1$ (ns) | $\alpha_2$ (%) | $\tau_2$ (ns) | $\alpha_3$ (%) | $\tau_3$ (ns) | $\tau_{ave}$ (ns) |
|--------|----------------|---------------|----------------|---------------|----------------|---------------|-------------------|
| 120 °C | 49.9           | 9.2           | 37.7           | 32.6          | 12.4           | 154.5         | 36.0              |
| 150 °C | 16.8           | 13.9          | 45.4           | 64.5          | 37.8           | 274.5         | 135.4             |
| 180 °C | 12.7           | 15.7          | 45.7           | 73.9          | 41.6           | 314.6         | 166.6             |

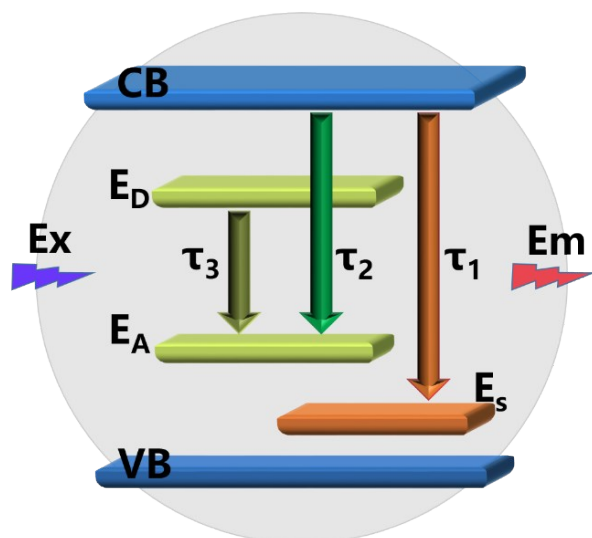

**Figure S1.** The schematic diagram of the radiation recombination mechanism of Cu-In-S NCs.

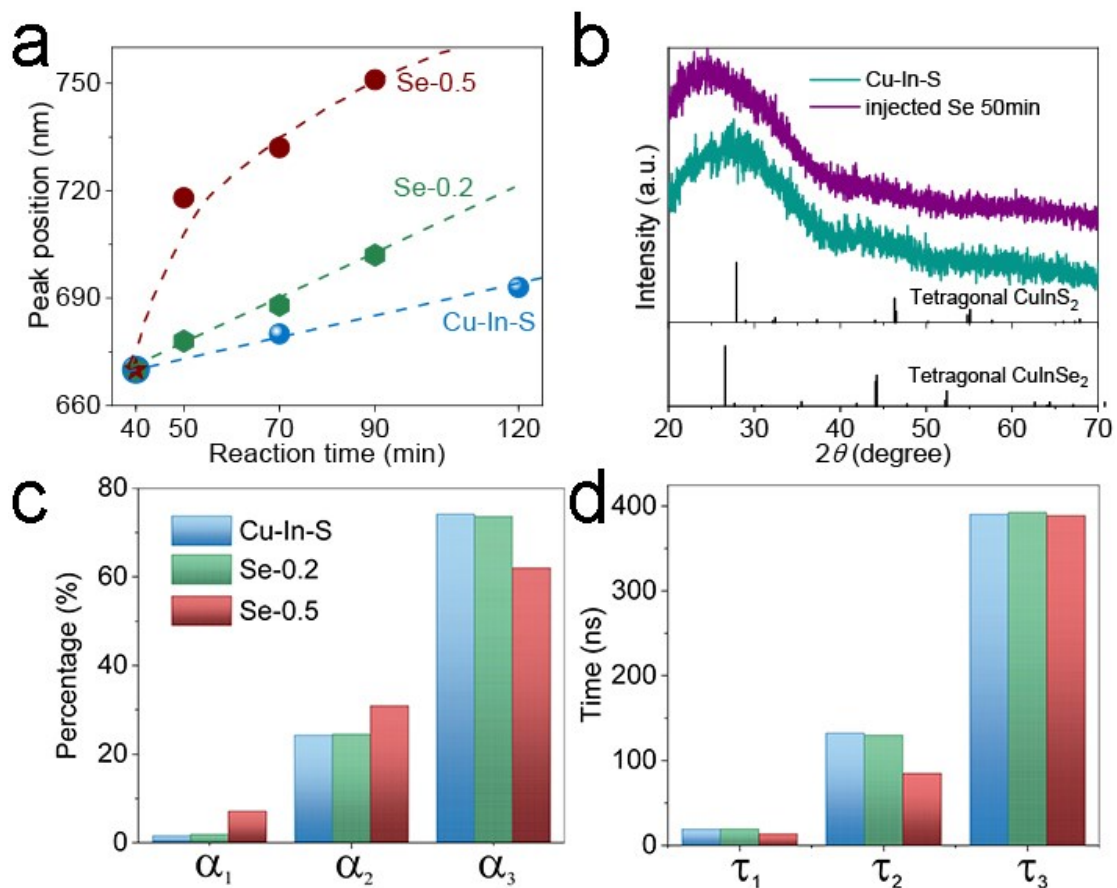

**Figure S2.** The summary of the Cu-In-S NCs before and after Se powder injected (0.2 mmol and 0.5 mmol): (a) emission peak position; (b) XRD of Cu-In-S obtained in 220 °C 40 min and the Cu-In-Se-S NCs prepared 50 min later after 0.2 mmol Se was injected. (c) The percentage of  $\alpha_1$ ,  $\alpha_2$  and  $\alpha_3$ ; (d) the time of  $\tau_1$ ,  $\tau_2$  and  $\tau_3$ .

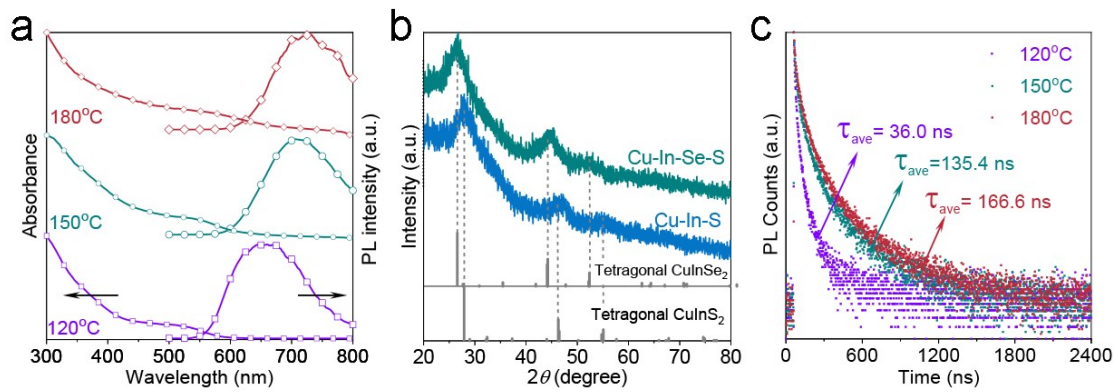

**Figure S3.** (a) Absorption and PL spectra of Cu-In-Se-S NCs in different temperatures. (b) Comparison of XRD patterns of Cu-In-S NCs obtained at 220 °C 40 min and Cu-In-Se-S NCs prepared at 150 °C, both of them are obtained in one-pot method. (c) Decay curves of Cu-In-Se-S NCs in different temperatures.

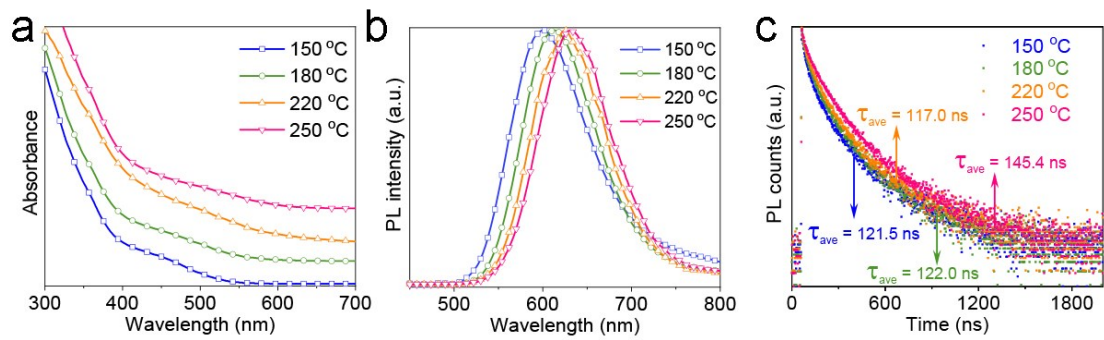

**Figure S4.** (a) Absorption and (b) emission spectra and (c) fluorescence decay curve of Cu-In-Zn-Se-S NCs via the one-pot method with 0.5 mmol Zn precursor (Zn-0.5).

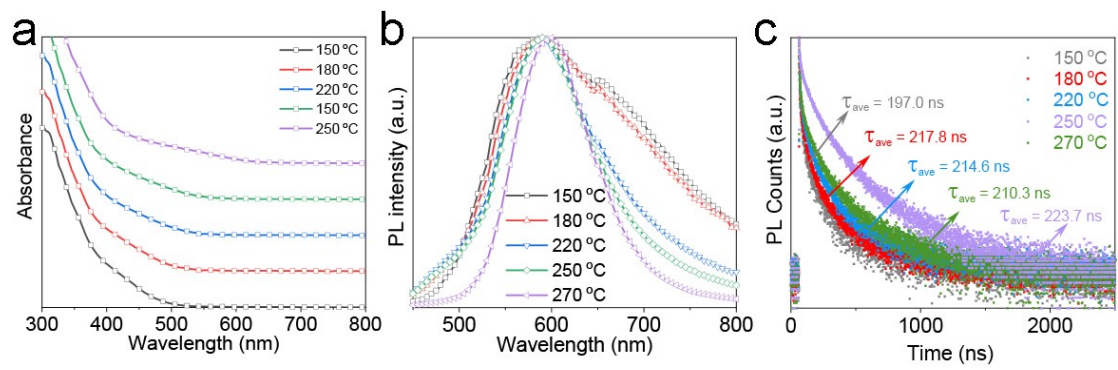

**Figure S5.** (a) Absorption and (b) emission spectra and (c) fluorescence decay curve of Cu-In-Zn-Se-S NCs via the one-pot method with 1 mmol Zn precursor (Zn-1).

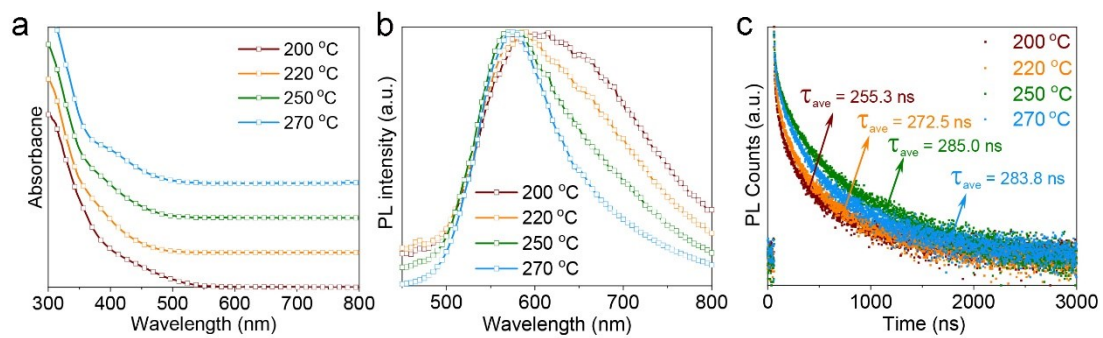

**Figure S6.** (a) Absorption and (b) emission spectra and (c) fluorescence decay curve of Cu-In-Zn-Se-S NCs via the one-pot method with 1.5 mmol Zn precursor (Zn-1.5).



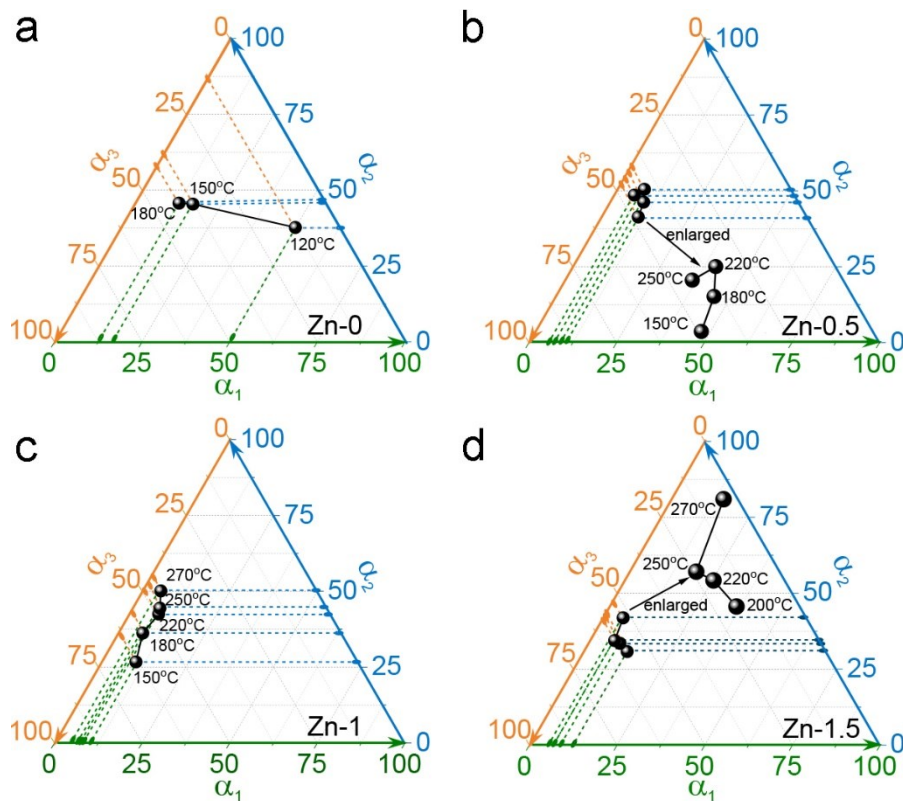

**Figure S7.** The change percentage of different combinations ( $\alpha_1$ ,  $\alpha_2$  and  $\alpha_3$ ) upon the temperature increasing under altering dosages of Zn precursor: (a) Zn-0, (b) Zn-0.5, (c) Zn-1, (d) Zn-1.5.

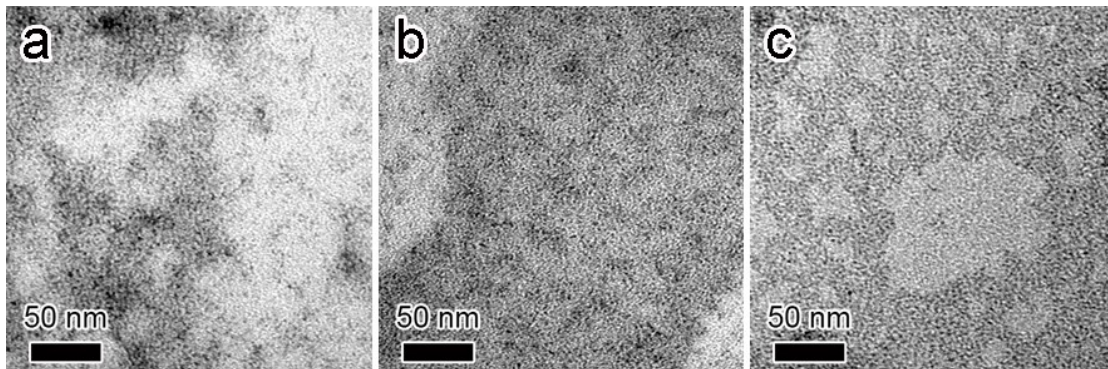

**Figure S8.** The TEM of (a) Zn-0 (150 °C), (b) Zn-0.5 (250 °C) and (c) Zn-1 (250 °C), and these samples were obtained by one-pot method.

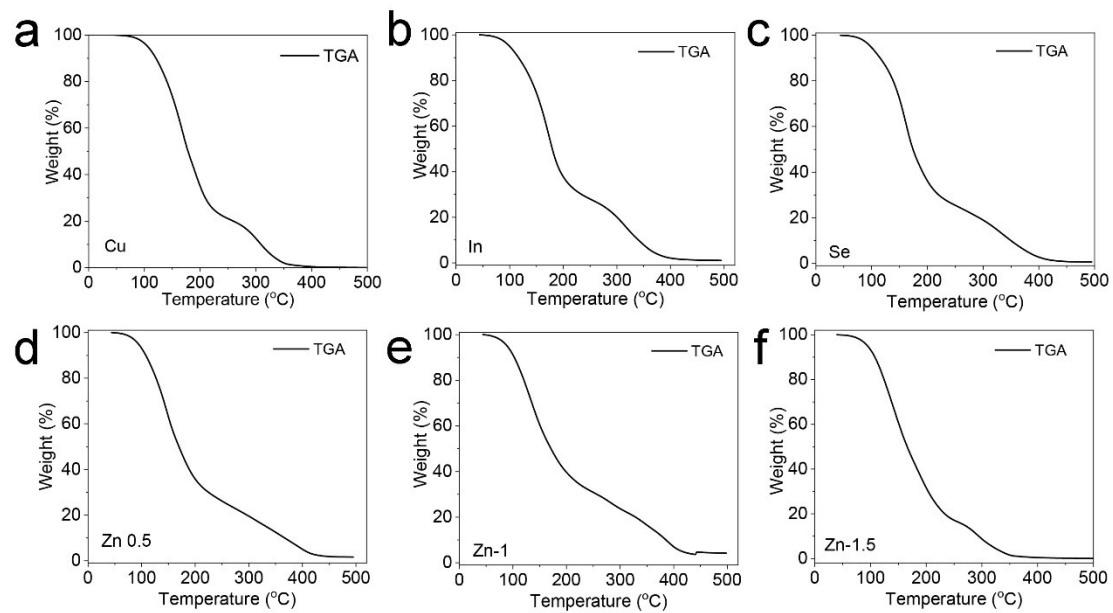

**Figure S9.** The thermogravimetric analysis data (TGA) of each ion mixed with organic matter respectively: (a) Cu, (b) In, (c) Se, (d) Zn-0.5, (e) Zn-1, (f) Zn-1.5.

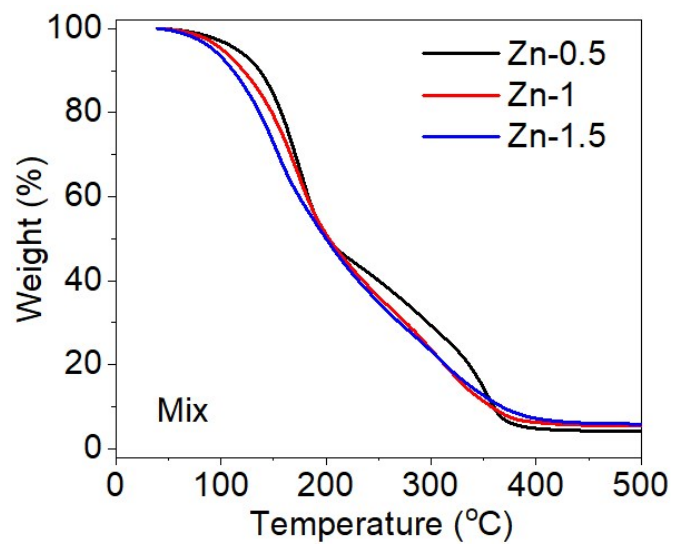

**Figure S10.** The thermogravimetric analysis (TGA) curves of all the precursors mixed with organic matters under different dosages of Zn, while other amounts kept constant.

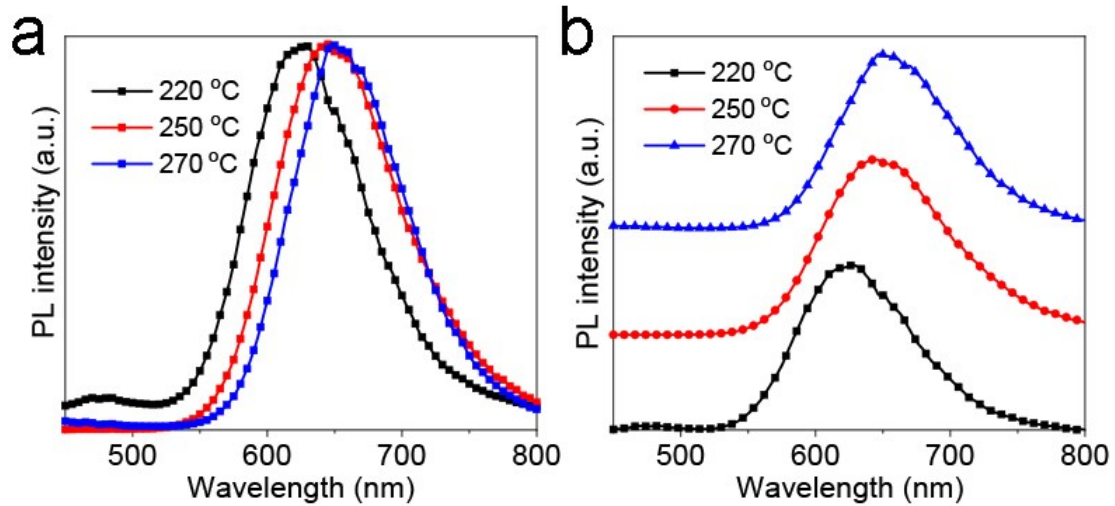

**Figure S11.** The emission spectra of Cu-In-Zn-Se-S NCs obtained by Cu precursor injected method and the dosage of Zn precursor is 0.5 mmol (Zn-0.5): (a) Normalized and (b) non-normalized.

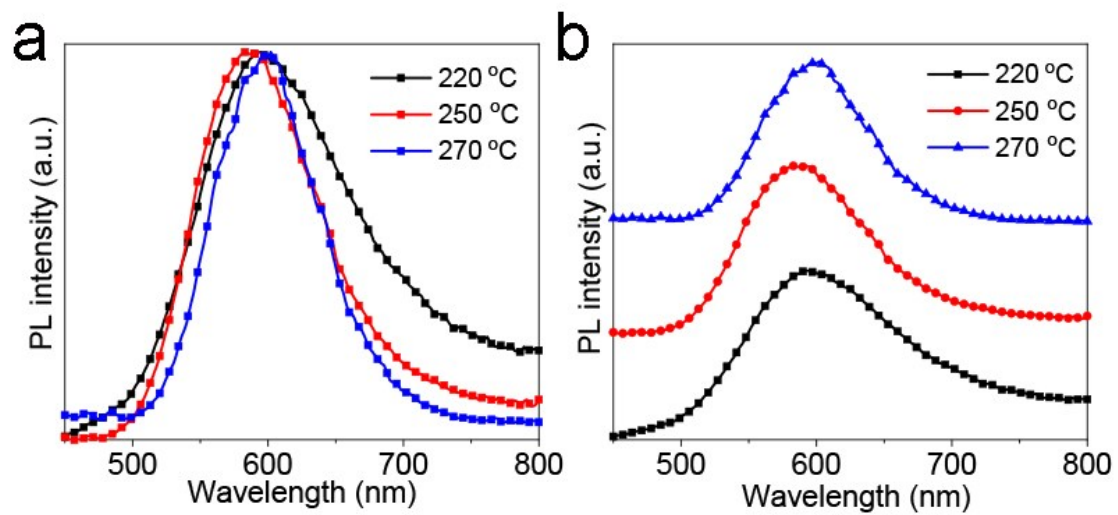

**Figure S12.** The emission spectra of Cu-In-Zn-Se-S NCs obtained by Cu precursor injected method and the dosage of Zn precursor is 1 mmol (Zn-1): (a) Normalized and (b) non-normalized.

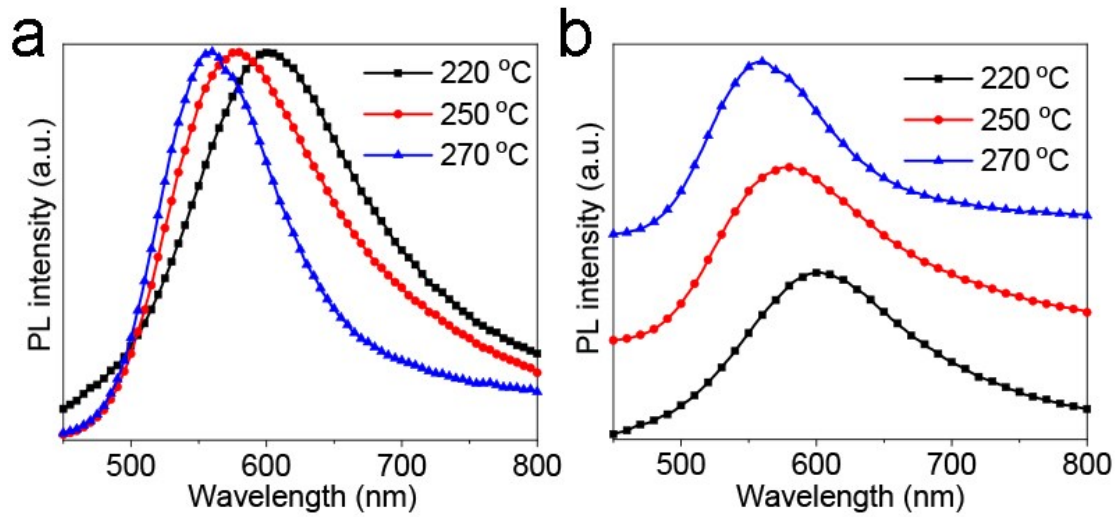

**Figure S13.** The emission spectra of Cu-In-Zn-Se-S NCs obtained by Cu precursor injected method and the dosage of Zn precursor is 1.5 mmol (Zn-1.5): (a) Normalized and (b) non-normalized.

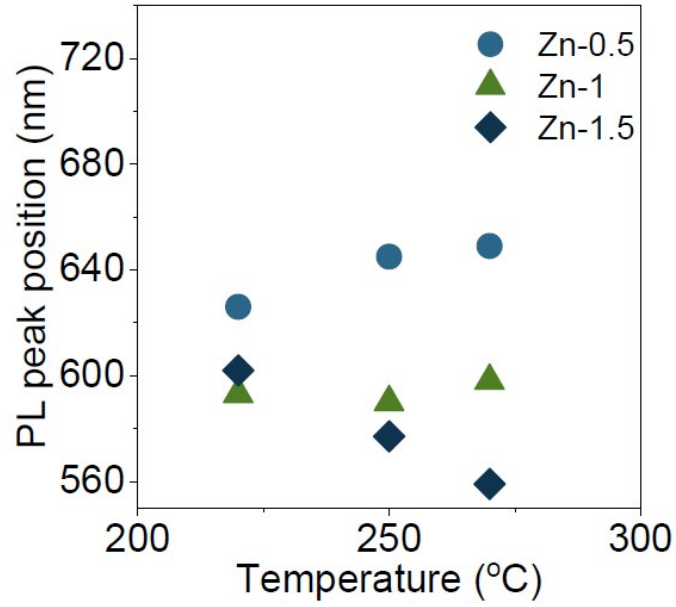

**Figure S14.** The summary of the emission peak position of Cu-In-Zn-Se-S NCs in different temperatures obtained by Cu precursor injected method with varying dosages of Zn precursor (Zn-0.5, Zn-1, Zn-1.5).
